# Supplementary material
Source: Springer Nature journal article supplement (https://www.springermedizin.de/resource/supplementary/12935_2013_434_MOESM6_ESM.pdf/9540628)
Supplement: MOESM6 [file 9540628]

| Tumor Suppressor miRNA   | Oncogenes |
|--------------------------|-----------|
| miR-125b ↓<br>miR-384-5p | PIK3CD    |
| miR-17-5p ↓              | TP53INP1  |
| miR-143 ↓                | BCL-2     |
| miR-424 ↓                | CHK1      |
| miR-214 ↓                | GALNT7    |
| Hsa-miR-15a-3p ↓         | BCL-XL    |
| miR-497 ↓                | IGF-1R    |
